# Supplementary material for: Subtyping Lung Cancer Using DNA Methylation in Liquid Biopsies
Source: PubMed Central journal article supplement (PMC6780554; doi:10.3390/jcm8091500), 2019-09-19
Supplement: jcm-08-01500-s001.pdf [file jcm-08-01500-s001.pdf]

**Supplementary Tables:**

**Table S1** - Primers used in study group #1 tissue samples and qMSP conditions for each gene.;

**Table S2** - Primers and probe sequences used in study group #2 and #3 plasma samples with respective fluorochrome and quencher.;

**Table S3** – Associations between clinical stage and *APC*, *HOXA9*, *RARβ2*, and *RASSF1A* methylation levels in study group #1. *P* values obtained by Kruskal–Wallis followed by Mann–Whitney U tests and Bonferroni’s correction;

**Table S4** – Associations between clinical stage and *APC*, *HOXA9*, *RARβ2*, and *RASSF1A* methylation levels in study group #2. *P* values obtained by Kruskal–Wallis followed by Mann–Whitney U tests and Bonferroni’s correction.

**Supplementary Figures:**

**Figure S1.** Receiver operating characteristic (ROC) curve of (A) *APC* and (B) *RASSF1A* for LCa detection in plasma samples (study group #2 and study group #3).

**Figure S2.** Receiver operating characteristic (ROC) curve of (A) *HOXA9* and (B) *RASSF1A* for small-cell lung cancer (SCLC) detection in plasma samples (study group #2).

**Figure S3.** Receiver operating characteristic (ROC) curve of *HOXA9* for squamous cell carcinoma detection in tissue samples (study group #1).

## Supplementary Tables

**Table S1** - Primers used in study group #1 tissue samples and qMSP conditions for each gene.

| Gene                            |         | Sequences                                       | Annealing Temperature | Primer concentration ( $\mu\text{M}$ ) |
|---------------------------------|---------|-------------------------------------------------|-----------------------|----------------------------------------|
| <i><math>\beta</math>-Actin</i> | Primers | F – 5' TGG TGA TGG AGG<br>AGG TTT AGT AAG T 3'  | 60                    | 400                                    |
|                                 |         | R – 5' ACC AAT AAA ACC<br>TAC TCC TCC CTT AA 3' |                       |                                        |
| APC                             | Primers | F – 5' TGT GTT TTA TTG<br>CGG AGT GC 3'         | 62                    | 300                                    |
|                                 |         | R – 5' CAC ATA TCG ATC<br>ACG TAC GC 3'         |                       |                                        |
| HOXA9                           | Primers | F – 5' TAT TTA GTC GGT<br>ATT CGC 3'            | 60                    | 300                                    |
|                                 |         | R – 5' ACC TCG AAC GCT<br>TCC CAT 3'            |                       |                                        |
| RAR $\beta$ 2                   | Primers | F – 5' TCG AGA ACG CGA<br>GCG ATT 3'            | 60                    | 300                                    |
|                                 |         | R – 5' GAC CAA TCC AAC<br>CGA AAC 3'            |                       |                                        |
| RASSF1A                         | Primers | F – 5' AGC GAA GTA CGG<br>GTT TAA TC 3'         | 60                    | 300                                    |
|                                 |         | R – 5' ACA CGC TCC AAC<br>CGA ATA 3'            |                       |                                        |

**Table S2** - Primers and probe sequences used in study group #2 and #3 plasma samples with respective fluorochrome and quencher.

| Gene                  | Sequences |                                                                        |
|-----------------------|-----------|------------------------------------------------------------------------|
| <i><b>β-Actin</b></i> | Primers   | F – 5' TGG TGA TGG AGG AGG TTT AGT AAG T 3'                            |
|                       |           | R – 5' ACC AAT AAA ACC TAC TCC TCC CTT AA 3'                           |
|                       | Probe     | 5' Cy5 – ACC ACC ACC CAA CAC ACA ATA ACA AAC ACA – QSY 3'              |
| <i><b>APC</b></i>     | Primers   | F – 5' TGT GTT TTA TTG CGG AGT GC 3'                                   |
|                       |           | R – 5' CAC ATA TCG ATC ACG TAC GC 3'                                   |
|                       | Probe     | 5' VIC – CAA TCG ACG AAC TCC CGA C – MGB 3'                            |
| <i><b>HOXA9</b></i>   | Primers   | F – 5' TAT TTA GTC GGT ATT CGC 3'                                      |
|                       |           | R – 5' ACC TCG AAC GCT TCC CAT 3'                                      |
|                       | Probe     | 5' FAM –GAA ACT ACC AAA CCG C– MGB 3'                                  |
| <i><b>RARβ2</b></i>   | Primers   | F – 5' TCG AGA ACG CGA GCG ATT 3'                                      |
|                       |           | R – 5' GAC CAA TCC AAC CGA AAC 3'                                      |
|                       | Probe     | 5' HEX – CTT ACA AAA AAC CTT CCG AAT ACG TTC CGA – Iowa Black RQ-Sp 3' |
| <i><b>RASSF1A</b></i> | Primers   | F – 5' AGC GAA GTA CGG GTT TAA TC 3'                                   |
|                       |           | R – 5' ACA CGC TCC AACC GA ATA 3'                                      |
|                       | Probe     | 5' NED – CGG GAG TTG GTA TTC GTT GGG CG – QSY 3'                       |

**Table S3** – Associations between clinical stage and *APC*, *HOXA9*, *RARβ2*, and *RASSF1A* methylation levels in study group #1. *P* values obtained by Kruskal–Wallis followed by Mann–Whitney U tests and Bonferroni’s correction.

|                               | <b>Clinical Stage</b> |              |              |                |
|-------------------------------|-----------------------|--------------|--------------|----------------|
|                               | <i>APC</i>            | <i>HOXA9</i> | <i>RARβ2</i> | <i>RASSF1A</i> |
| <i>I vs II</i>                | n.s.                  | -            | n.s.         | n.s.           |
| <i>I vs III</i>               | n.s.                  | -            | n.s.         | n.s.           |
| <i>I vs IV</i>                | <0.0001               | -            | <0.0001      | <0.0001        |
| <i>II vs III</i>              | n.s.                  | -            | n.s.         | n.s.           |
| <i>II vs IV</i>               | 0.024                 | -            | 0.0006       | 0.018          |
| <i>III vs IV</i>              | 0.084                 | -            | 0.024        | 0.024          |
| <i>p</i> value Kruskal–Wallis | 0.001                 | n.s.         | <0.0001      | <0.0001        |

n.s., not significant

**Table S4** – Associations between clinical stage and *APC*, *HOXA9*, *RARβ2*, and *RASSF1A* methylation levels in study group #2. *P* values obtained by Kruskal–Wallis followed by Mann–Whitney U tests and Bonferroni’s correction.

|                               | <b>Clinical Stage</b> |              |              |                |
|-------------------------------|-----------------------|--------------|--------------|----------------|
|                               | <i>APC</i>            | <i>HOXA9</i> | <i>RARβ2</i> | <i>RASSF1A</i> |
| <i>I vs II</i>                | -                     | n.s.         | -            | n.s.           |
| <i>I vs III</i>               | -                     | n.s.         | -            | n.s.           |
| <i>I vs IV</i>                | -                     | n.s.         | -            | n.s.           |
| <i>II vs III</i>              |                       | n.s.         |              | n.s.           |
| <i>II vs IV</i>               | -                     | n.s.         | -            | n.s.           |
| <i>III vs IV</i>              | -                     | n.s.         | -            | 0.018          |
| <i>p</i> value Kruskal–Wallis | 0.073                 | 0.002        | n.s.         | 0.014          |

n.s., not significant

## Supplementary Figures

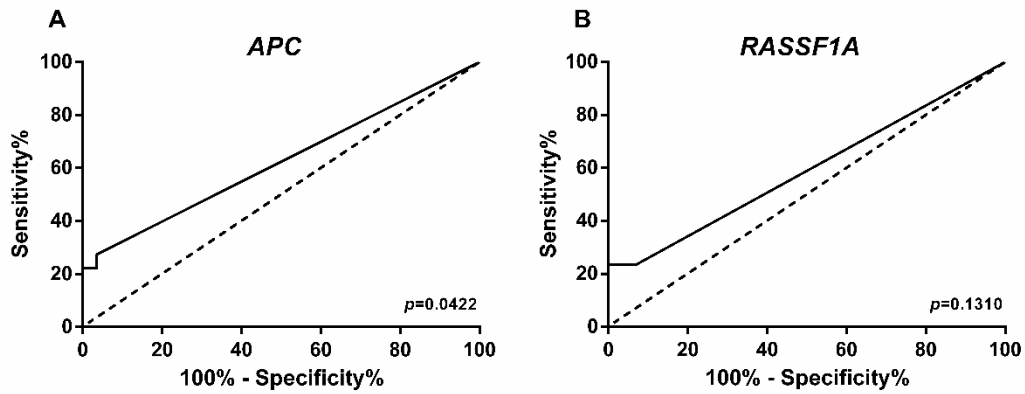

**Figure S1.** Receiver operating characteristic (ROC) curve of (A) *APC* and (B) *RASSF1A* for LCa detection in plasma samples (study group #2 and study group #3).

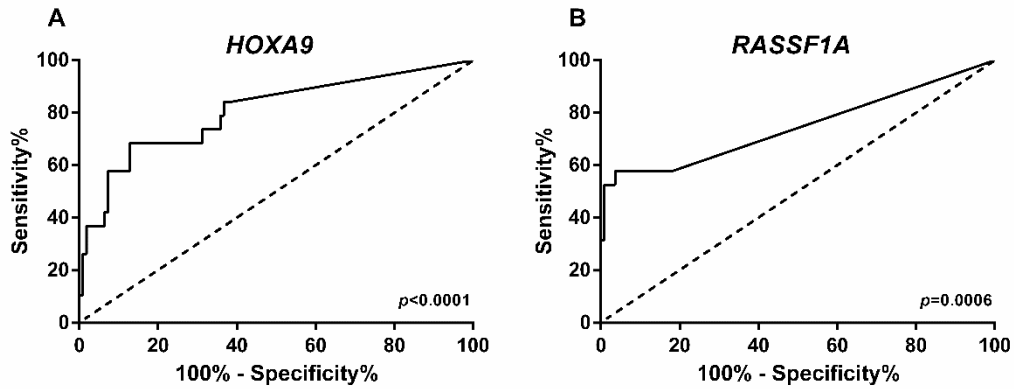

**Figure S2.** Receiver operating characteristic (ROC) curve of (A) *HOXA9* and (B) *RASSF1A* for small-cell lung cancer (SCLC) detection in plasma samples (study group #2).

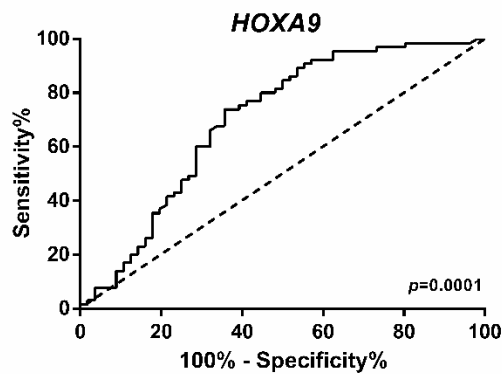

**Figure S3.** Receiver operating characteristic (ROC) curve of *HOXA9* for squamous cell carcinoma detection in tissue samples (study group #1).
